# Supplementary material for: Histone acetylome-wide associations in immune cells from individuals with active Mycobacterium tuberculosis infection
Source: PubMed Central journal article supplement (PMC9439955; doi:10.1038/s41564-021-01049-w), 2022-01-31
Supplement: 41564_2021_1049_MOESM2_ESM.pdf [file 41564_2021_1049_MOESM2_ESM.pdf]

## Reporting Summary

Nature Research wishes to improve the reproducibility of the work that we publish. This form provides structure for consistency and transparency in reporting. For further information on Nature Research policies, see [Authors & Referees](#) and the [Editorial Policy Checklist](#).

### Statistics

For all statistical analyses, confirm that the following items are present in the figure legend, table legend, main text, or Methods section.

n/a Confirmed

- The exact sample size ( $n$ ) for each experimental group/condition, given as a discrete number and unit of measurement
- A statement on whether measurements were taken from distinct samples or whether the same sample was measured repeatedly
- The statistical test(s) used AND whether they are one- or two-sided  
*Only common tests should be described solely by name; describe more complex techniques in the Methods section.*
- A description of all covariates tested
- A description of any assumptions or corrections, such as tests of normality and adjustment for multiple comparisons
- A full description of the statistical parameters including central tendency (e.g. means) or other basic estimates (e.g. regression coefficient) AND variation (e.g. standard deviation) or associated estimates of uncertainty (e.g. confidence intervals)
- For null hypothesis testing, the test statistic (e.g.  $F$ ,  $t$ ,  $r$ ) with confidence intervals, effect sizes, degrees of freedom and  $P$  value noted  
*Give  $P$  values as exact values whenever suitable.*
- For Bayesian analysis, information on the choice of priors and Markov chain Monte Carlo settings
- For hierarchical and complex designs, identification of the appropriate level for tests and full reporting of outcomes
- Estimates of effect sizes (e.g. Cohen's  $d$ , Pearson's  $r$ ), indicating how they were calculated

*Our web collection on [statistics for biologists](#) contains articles on many of the points above.*

### Software and code

Policy information about [availability of computer code](#)

Data collection

No software was used for data collection

Data analysis

SAMtools (Li, 2011) version 0.1.19-44428cd  
 BWA (Li and Durbin, 2009) version 0.7.10-r789  
 Picard Tools broadinstitute.github.io/picard/  
 BedTools (Quinlan and Hall 2010) version 2.25.0  
 DFilter (Kumar et al., 2013) version 1.6 <http://collaborations.gis.a-star.edu.sg/~cmb6/kumarv1/dfilter/>  
 GREAT (McLean et al., 2010) version 3.0.0  
 GORilla (Eden et al., 2009) <http://cbl-gorilla.cs.technion.ac.il>  
 HOMER (Heinz et al., 2010) version 4.10  
 GATK version 3.2-2 (DePristo et al., 2011) <https://software.broadinstitute.org/gatk/>  
 G-SCI test (del Rosario et al., 2015) [http://collaborations.gis.a-star.edu.sg/~cmb6/G-SCI\\_test/](http://collaborations.gis.a-star.edu.sg/~cmb6/G-SCI_test/)  
 R The R Project for Statistical Computing <https://www.r-project.org/>  
 UCSC Genome Browser University of California Santa Cruz <https://genome.ucsc.edu/>  
 FlowJo Three Star <https://www.flowjo.com/>  
 ZEN software platform Carl Zeiss <https://www.zeiss.com/microscopy/int/products/microscope-software/zen.html>  
 softWoRX Suite 2.0 Applied Precision, GE Healthcare [http://www.gelifesciences.co.kr/wp-content/uploads/2016/11/softworx\\_suite\\_overview.pdf](http://www.gelifesciences.co.kr/wp-content/uploads/2016/11/softworx_suite_overview.pdf)  
 Imaris software (Andor-Bitplane, Zurich) Andor-Bitplane, Zurich [www.bitplane.com/](http://www.bitplane.com/)  
 LD score regression (Finucane, et al., 2015) <https://github.com/bulik/ldsc>

For manuscripts utilizing custom algorithms or software that are central to the research but not yet described in published literature, software must be made available to editors/reviewers. We strongly encourage code deposition in a community repository (e.g. GitHub). See the Nature Research [guidelines for submitting code & software](#) for further information.

## Data

Policy information about [availability of data](#)

All manuscripts must include a [data availability statement](#). This statement should provide the following information, where applicable:

- Accession codes, unique identifiers, or web links for publicly available datasets
- A list of figures that have associated raw data
- A description of any restrictions on data availability

ChIP-seq data have been deposited at the European Genome-phenome Archive EGA, <http://www.ebi.ac.uk/ega/>), which is hosted by the EBI, under accession number EGAS00001003118. RNA-seq data have been deposited at NCBI's Gene Expression Omnibus through GEO Series accession number GSE126614. The following figures have associated raw data provided as excel files: Figs. 1-4 and 6.

## Field-specific reporting

Please select the one below that is the best fit for your research. If you are not sure, read the appropriate sections before making your selection.

- Life sciences       Behavioural & social sciences       Ecological, evolutionary & environmental sciences

For a reference copy of the document with all sections, see [nature.com/documents/nr-reporting-summary-flat.pdf](https://www.nature.com/documents/nr-reporting-summary-flat.pdf)

## Life sciences study design

All studies must disclose on these points even when the disclosure is negative.

|                 |                                                                                                                                                                                                                                                                                                                                                                                                                                       |
|-----------------|---------------------------------------------------------------------------------------------------------------------------------------------------------------------------------------------------------------------------------------------------------------------------------------------------------------------------------------------------------------------------------------------------------------------------------------|
| Sample size     | 238 ChIP-seq, 78 RNA-seq                                                                                                                                                                                                                                                                                                                                                                                                              |
| Data exclusions | For ChIP-seq samples, we discarded samples with low complexity as measured by the number of unique read-pairs (<15 million for Batches 1 and 2; <30 million for Batch 3). We also discarded samples with high GC bias (>4,500 peaks showing greater than two-fold GC bias in either direction). For RNA-seq samples, we discarded one sample with poor quality (percent reads mapped =45.3% and percent uniquely mapped reads=43.1%). |
| Replication     | To ensure replication we performed a replication study (for ChIP-seq only)                                                                                                                                                                                                                                                                                                                                                            |
| Randomization   | Covariates were controlled for by regression (see methods)                                                                                                                                                                                                                                                                                                                                                                            |
| Blinding        | The study was undertaken to find the H3K27ac and transcriptomic differences between known tuberculosis and healthy individuals. Hence no blinding was performed                                                                                                                                                                                                                                                                       |

## Reporting for specific materials, systems and methods

We require information from authors about some types of materials, experimental systems and methods used in many studies. Here, indicate whether each material, system or method listed is relevant to your study. If you are not sure if a list item applies to your research, read the appropriate section before selecting a response.

### Materials & experimental systems

| n/a                                 | Involvement in the study                                        |
|-------------------------------------|-----------------------------------------------------------------|
| <input type="checkbox"/>            | <input checked="" type="checkbox"/> Antibodies                  |
| <input type="checkbox"/>            | <input checked="" type="checkbox"/> Eukaryotic cell lines       |
| <input checked="" type="checkbox"/> | <input type="checkbox"/> Palaeontology                          |
| <input checked="" type="checkbox"/> | <input type="checkbox"/> Animals and other organisms            |
| <input type="checkbox"/>            | <input checked="" type="checkbox"/> Human research participants |
| <input checked="" type="checkbox"/> | <input type="checkbox"/> Clinical data                          |

### Methods

| n/a                                 | Involvement in the study                           |
|-------------------------------------|----------------------------------------------------|
| <input type="checkbox"/>            | <input checked="" type="checkbox"/> ChIP-seq       |
| <input type="checkbox"/>            | <input checked="" type="checkbox"/> Flow cytometry |
| <input checked="" type="checkbox"/> | <input type="checkbox"/> MRI-based neuroimaging    |

## Antibodies

Antibodies used

Anti-KCNJ15 (Sigma-Aldrich, #HPA016702)  
 anti-APAF-1 (Cell Signaling Technology, #5088)  
 anti-beta-actin (Cell Signaling Technology, #4967)  
 Annexin V APC (Biolegend, #640932)  
 anti-glyceraldehyde-3-phosphate dehydrogenase (GAPDH) (14C10) (Cell Signaling Technology, #2118)  
 anti-rabbit immunoglobulin G (IgG) horseradish peroxidase (HRP)-linked antibody (Cell Signaling Technology, #7074)  
 mouse IgG1 kappa isotype control eFluor 450 (eBioscience, #48-4714-82)  
 H3K27ac antibody for all ChIP experiments (Catalogue #39133; Active Motif)

## Validation

Each antibody is validated for FACS staining as per manufacturers description. We also used FMO and isotype controls for validating the staining.

## Eukaryotic cell lines

### Policy information about [cell lines](#)

## Cell line source(s)

Human monocyte THP-1 cells from ATCC

## Authentication

This cell line was bought from ATCC

## Mycoplasma contamination

This cell line was tested for Mycoplasma and was found to be negative.

Commonly misidentified lines  
(See [ICLAC](#) register)

*Name any commonly misidentified cell lines used in the study and provide a rationale for their use.*

## Human research participants

### Policy information about [studies involving human research participants](#)

## Population characteristics

See Supplementary Table 1 and Supplementary Table 19

## Recruitment

Singaporean Cohort (Cohorts 1-3):

HIV-negative ATB patients (based on clinical diagnosis with mycobacterial and radiographic evidence) and HC individuals (negative for IFN- $\gamma$  release assay (IGRA); QuantiFERON TB gold test) were recruited at Tan Tock Seng Hospital's Tuberculosis Control Unit (TTSH, TBCU). Additional HC individuals were recruited locally at SigN. Patients were sampled within 4 days of anti-TB treatment initiation and excluded if they had previously received anti-TB therapy. All participants provided written informed consent.

South African Cohort (Cohort 4):

1) ATB: All ATB patients (median age: 27.3; interquartile range (IQR): 23-33; 60% male) were tested sputum Xpert MTB/RIF (Xpert, Cepheid, Sunnyvale, CA) positive and had clinical symptoms and/or radiographic evidence of TB. All ATB cases were drug sensitive and had received no more than one dose of anti-tubercular treatment at the time of baseline blood sampling. A follow-up sample was obtained at completion of TB treatment (24 weeks).

2) LTBI: All individuals with latent Mtb infection (median age: 26.5; IQR: 23-33; 60% male) were asymptomatic, had a positive IFN- $\gamma$  release assay (IGRA, QuantiFERON<sup>®</sup>-TB Gold In-Tube, Qiagen, Hilden), tested sputum Xpert MTB/RIF negative and exhibited no clinical evidence of active TB.

3) HC: Health controls (medium age: 30.5; IQR: 24-32; 40% male) were negative for IFN- $\gamma$  release assay, tested sputum Xpert MTB/RIF negative and exhibited no clinical evidence of active TB.

In all cohorts, no compensation was given to any participant.

## Ethics oversight

This study was approved by the Domain Specific Review Board of the National Healthcare Group (#2010/00566) and Institutional Review Board of the National University of Singapore (#09-256).

The South African cohort (Cohort 4) was recruited from the Ubuntu Clinic, Site B, Khayelitsha (Cape Town, South Africa) between March 2017 and December 2018. All participants were HIV-uninfected adults (age  $\geq$  18 yr) and provided written informed consent. The study was approved by the University of Cape Town Human Research Ethics Committee (HREC: 050/2015) and was conducted under DMID protocol no.15-0047.

Note that full information on the approval of the study protocol must also be provided in the manuscript.

## ChIP-seq

### Data deposition

Confirm that both raw and final processed data have been deposited in a public database such as [GEO](#).

Confirm that you have deposited or provided access to graph files (e.g. BED files) for the called peaks.

## Data access links

*May remain private before publication.*

EGAS00001003118 (EGA)

## Files in database submission

T1G3\_CON\_dedupped.bam  
T1G4\_CON\_dedupped.bam  
T1G5\_CON\_dedupped.bam  
T2G1\_INF\_dedupped.bam  
T2G2\_CON\_dedupped.bam  
T2G4\_CON\_dedupped.bam  
T2G5\_INF\_dedupped.bam  
T3G2\_INF\_dedupped.bam  
T3G5\_INF\_dedupped.bam  
T3G6\_INF\_dedupped.bam

T4G2\_INF\_dedupped.bam  
T4G5\_CON\_dedupped.bam  
T9G1\_INF\_dedupped.bam  
T10G1\_CON\_dedupped.bam  
T10G3\_INF\_dedupped.bam  
T10G4\_INF\_dedupped.bam  
T11G1\_CON\_dedupped.bam  
T11G2\_INF\_dedupped.bam  
T11G3\_CON\_dedupped.bam  
T11G4\_CON\_dedupped.bam  
T12G4\_INF\_dedupped.bam  
T12G6\_INF\_dedupped.bam  
T13G3\_INF\_dedupped.bam  
T13G5\_INF\_dedupped.bam  
T13G6\_INF\_dedupped.bam  
T14G1\_CON\_dedupped.bam  
T14G4\_INF\_dedupped.bam  
CHP049\_CON\_dedupped.bam  
CHP050\_CON\_dedupped.bam  
CHP052\_INF\_dedupped.bam  
CHP053\_INF\_dedupped.bam  
CHP055\_INF\_dedupped.bam  
CHP056\_CON\_dedupped.bam  
CHP057\_INF\_dedupped.bam  
CHP058\_CON\_dedupped.bam  
CHP059\_CON\_dedupped.bam  
CHP091\_CON\_dedupped.bam  
CHP092\_INF\_dedupped.bam  
CHP094\_CON\_dedupped.bam  
CHP095\_CON\_dedupped.bam  
CHP097\_CON\_dedupped.bam  
CHP098\_INF\_dedupped.bam  
CHP099\_CON\_dedupped.bam  
CHP100\_CON\_dedupped.bam  
CHP101\_CON\_dedupped.bam  
T1G1\_INF\_dedupped.bam  
T1G6\_CON\_dedupped.bam  
T2G6\_INF\_dedupped.bam  
T3G1\_CON\_dedupped.bam  
T3G4\_INF\_dedupped.bam  
T4G3\_INF\_dedupped.bam  
T4G4\_INF\_dedupped.bam  
T4G6\_CON\_dedupped.bam  
T9G2\_CON\_dedupped.bam  
T9G3\_CON\_dedupped.bam  
T9G4\_CON\_dedupped.bam  
T9G5\_INF\_dedupped.bam  
T10G2\_CON\_dedupped.bam  
T10G5\_CON\_dedupped.bam  
T10G6\_CON\_dedupped.bam  
T11G5\_INF\_dedupped.bam  
T11G6\_CON\_dedupped.bam  
T12G1\_INF\_dedupped.bam  
T13G2\_INF\_dedupped.bam  
T13G4\_INF\_dedupped.bam  
T14G3\_CON\_dedupped.bam  
CHP048\_CON\_dedupped.bam  
CHP051\_INF\_dedupped.bam  
CHP054\_INF\_dedupped.bam  
CHP090\_INF\_dedupped.bam  
CHP096\_CON\_dedupped.bam  
CHP118\_CON\_dedupped.bam  
CHP119\_INF\_dedupped.bam  
T5M3\_CON\_dedupped.bam  
T5M4\_INF\_dedupped.bam  
T5M5\_CON\_dedupped.bam  
T6M1\_INF\_dedupped.bam  
T6M2\_CON\_dedupped.bam  
T6M4\_INF\_dedupped.bam  
T7M2\_INF\_dedupped.bam  
T7M5\_INF\_dedupped.bam  
T8M1\_INF\_dedupped.bam  
T8M2\_INF\_dedupped.bam  
T8M4\_CON\_dedupped.bam  
T8M5\_INF\_dedupped.bam

T8M6\_INF\_dedupped.bam  
CHP060\_CON\_dedupped.bam  
CHP064\_CON\_dedupped.bam  
CHP067\_CON\_dedupped.bam  
CHP068\_INF\_dedupped.bam  
CHP069\_INF\_dedupped.bam  
CHP070\_CON\_dedupped.bam  
CHP071\_CON\_dedupped.bam  
CHP072\_INF\_dedupped.bam  
CHP073\_INF\_dedupped.bam  
CHP074\_CON\_dedupped.bam  
CHP076\_INF\_dedupped.bam  
CHP077\_CON\_dedupped.bam  
CHP079\_CON\_dedupped.bam  
CHP080\_INF\_dedupped.bam  
CHP081\_INF\_dedupped.bam  
CHP082\_CON\_dedupped.bam  
CHP087\_CON\_dedupped.bam  
CHP088\_CON\_dedupped.bam  
CHP108\_CON\_dedupped.bam  
T5M2\_CON\_dedupped.bam  
T5M6\_CON\_dedupped.bam  
T6M3\_INF\_dedupped.bam  
T6M5\_CON\_dedupped.bam  
T6M6\_CON\_dedupped.bam  
T7M1\_CON\_dedupped.bam  
T7M4\_INF\_dedupped.bam  
T7M6\_INF\_dedupped.bam  
T8M3\_CON\_dedupped.bam  
CHP061\_CON\_dedupped.bam  
CHP065\_INF\_dedupped.bam  
CHP066\_INF\_dedupped.bam  
CHP075\_CON\_dedupped.bam  
CHP078\_CON\_dedupped.bam  
CHP084\_CON\_dedupped.bam  
CHP089\_CON\_dedupped.bam  
CHP102\_CON\_dedupped.bam  
CHP103\_CON\_dedupped.bam  
CHP106\_CON\_dedupped.bam  
CHP107\_CON\_dedupped.bam  
CHP110\_CON\_dedupped.bam  
CHP111\_CON\_dedupped.bam  
CHP112\_INF\_dedupped.bam  
CHP113\_INF\_dedupped.bam  
CHP126\_CON\_dedupped.bam  
CHP127\_CON\_dedupped.bam  
CHP129\_CON\_dedupped.bam  
CHP130\_INF\_dedupped.bam  
CHP132\_CON\_dedupped.bam  
TB\_\_1\_trimmed\_dedup.bam  
TB\_\_13\_trimmed\_dedup.bam  
TB\_\_14\_trimmed\_dedup.bam  
TB\_\_16\_trimmed\_dedup.bam  
TB\_\_17\_trimmed\_dedup.bam  
TB\_\_18\_trimmed\_dedup.bam  
TB\_\_19\_trimmed\_dedup.bam  
TB\_\_20\_trimmed\_dedup.bam  
TB\_\_22\_trimmed\_dedup.bam  
TB\_\_23\_trimmed\_dedup.bam  
TB\_\_24\_trimmed\_dedup.bam  
TB\_\_25\_trimmed\_dedup.bam  
TB\_\_26\_trimmed\_dedup.bam  
TB\_\_3\_trimmed\_dedup.bam  
TB\_\_30\_trimmed\_dedup.bam  
TB\_\_32\_trimmed\_dedup.bam  
TB\_\_34\_trimmed\_dedup.bam  
TB\_\_36\_trimmed\_dedup.bam  
TB\_\_37\_trimmed\_dedup.bam  
TB\_\_38\_trimmed\_dedup.bam  
TB\_\_39\_trimmed\_dedup.bam  
TB\_\_4\_trimmed\_dedup.bam  
TB\_\_41\_trimmed\_dedup.bam  
TB\_\_5\_trimmed\_dedup.bam  
TB\_\_6\_trimmed\_dedup.bam

TB\_\_7\_trimmed\_dedup.bam

Genome browser session  
(e.g. [UCSC](#))

no longer applicable

## Methodology

Replicates

Each sample was sequenced once.

Sequencing depth

The reads are paired end 2x100 bp. For each sample, the number of non-redundant read-pairs (min 16.8 million read pairs, average 52.6 million read pairs) and the median insert size are given in Supplementary Tables 2, 4, 6, 8 and 19.

Antibodies

H3K27ac antibody Catalogue #39133; Active Motif

Peak calling parameters

Alignment: `bwa mem -t 4 hg19.fa read1.fastq read2.fastq | samtools view -Sbh - > bamfile.bam`convert bam to bed using bedTools: `bamToBed -i bamfile.bam 1>bamtobed.bed`Peak Calling: `run_dfilter.sh -d=bamtobed.bed -c=bamtobed_input.bed -o=outputfile -ks=100 -redund=1000`

Data quality

Duplicate reads (read-pairs mapping to the same genomic location) were collapsed. For each sample, ChIP-seq peaks were detected using DFilter at a P-value threshold of  $1e-6$ . For either cell type, the initial peak set was defined as the union of peaks from the entire set of discovery and validation samples from Batches 1 and 2, which included the vast majority of samples (Table S1). Peaks wider than 8Kb were then discarded. We performed multi-sample correction for GC bias (refs 13, 37) separately on each processing batch. We then discarded samples with low complexity as measured by the number of unique read-pairs (<15 million for Batches 1 and 2; <30 million for Batch 3). We also discarded samples with high GC bias (>4,500 peaks showing greater than two-fold GC bias in either direction). The number of peaks called for each sample is given in Supplementary Tables 2, 4, 6, and 8. Coordinates (bed format) of DA peaks are in Supplementary Tables 3, 5, 7 and 9.

Software

read mapping: `bwa 0.7.10-r789, samtools 0.1.19-44428cd`bedtools: `bedtools v2.25.0`peak calling: `DFilter1.6`

## Flow Cytometry

### Plots

Confirm that:

- The axis labels state the marker and fluorochrome used (e.g. CD4-FITC).
- The axis scales are clearly visible. Include numbers along axes only for bottom left plot of group (a 'group' is an analysis of identical markers).
- All plots are contour plots with outliers or pseudocolor plots.
- A numerical value for number of cells or percentage (with statistics) is provided.

### Methodology

Sample preparation

PBMCs and granulocytes were isolated from freshly drawn blood. From PBMCs, monocytes were isolated using CD14+ immunomagnetic separation beads (MACS, Miltenyi). Isolated CD14+ and granulocytes were assessed for purity by flow cytometry. In some experiments monocytes were stimulated with potassium for defined time-point. Cells (unstimulated and stimulated) were washed and single-cell suspensions were resuspended in PBS and stained for 30min with live/dead fixable aqua dead cell stain kit (Thermo Fisher Scientific, #L34965). Cells were then stained with respective antibodies. In experiments where phosphorylated substrate was assessed, Live/Dead stained cells were washed with FACS buffer (containing PBS with 3% FBS, 1mM EDTA and 0.1% sodium azide) and incubated with Human TruStain FcX™ (BioLegend, #422302) for 20min. Following this, cells were washed with FACS buffer, fixed and permeabilized using the PerFix EXPOSE kit (Beckman Coulter, #B26976) according to manufacturer's instructions. Permeabilized cells were incubated for 30 min in the dark with fluorophore-conjugated antibodies specific for phosphorylated marker or isotype control antibodies.

Instrument

BD LSRII

Software

BD FACSDiva software was used to collect the acquired flow data. Data was analysed using FlowJo software.

Cell population abundance

The purified CD14+ monocytes and granulocytes showed purity &gt;95%.

Gating strategy

The CD14+ mononuclear cells were FSC/SSC gated. Upon this single cells were gated using FSC-H/FSC-A. Single cells were used to gate out dead cells using fixable live-dead stain. Live cells were assessed for the staining by antibodies targeting phosphorylated substrates.

Gating strategy for apoptosis experiment has been added in Supplementary Fig 8

- Tick this box to confirm that a figure exemplifying the gating strategy is provided in the Supplementary Information.
