# Supplementary material for: Histone acetylome-wide associations in immune cells from individuals with active Mycobacterium tuberculosis infection
Source: PubMed Central journal article supplement (PMC9439955; doi:10.1038/s41564-021-01049-w), 2022-01-31

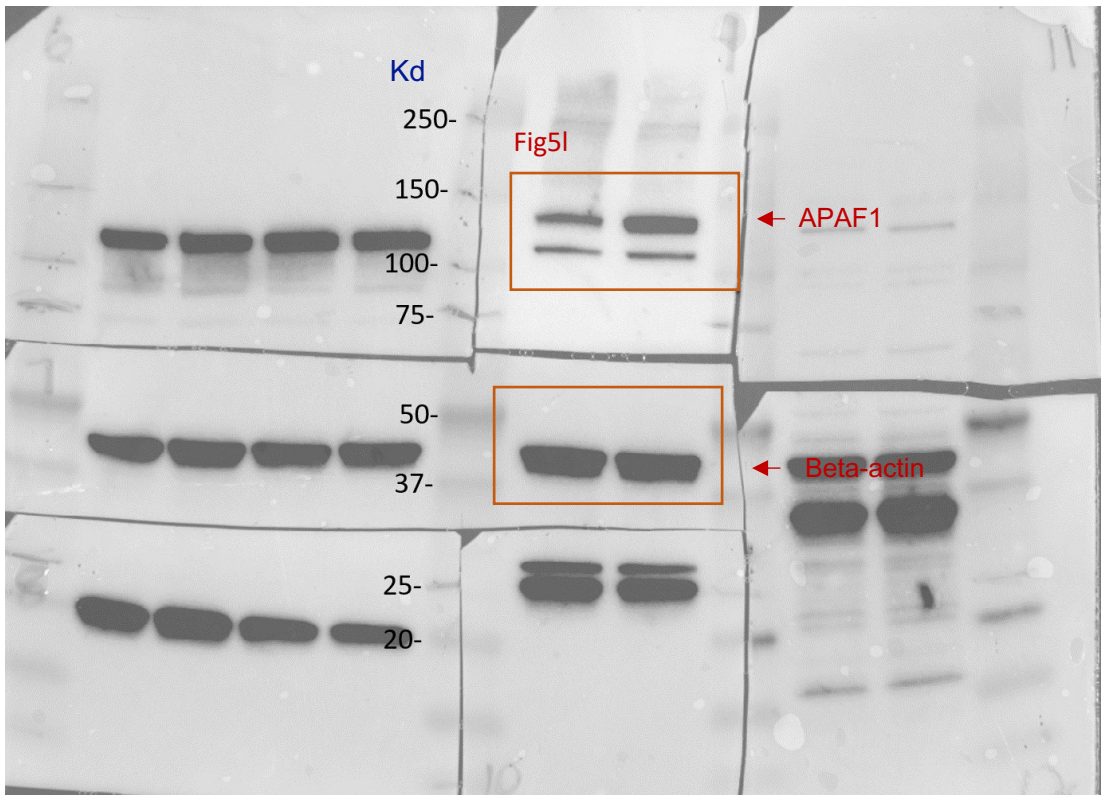

Supplement: 41564_2021_1049_MOESM11_ESM.pdf [file 41564_2021_1049_MOESM11_ESM.pdf]
