# Supplementary material for: Histone acetylome-wide associations in immune cells from individuals with active Mycobacterium tuberculosis infection
Source: PubMed Central journal article supplement (PMC9439955; doi:10.1038/s41564-021-01049-w), 2022-01-31

12% , 15sec

3/18/17

Mtb infection in THP1

UN    IN 3h    IN 24h    IN 24h + 60mM K<sup>+</sup>    KCMY KO 3h    KCMY KO 24h    KCMY KO 24h + 60mM K<sup>+</sup>

Extended-Data Fig4b

Extended-Data Fig4h

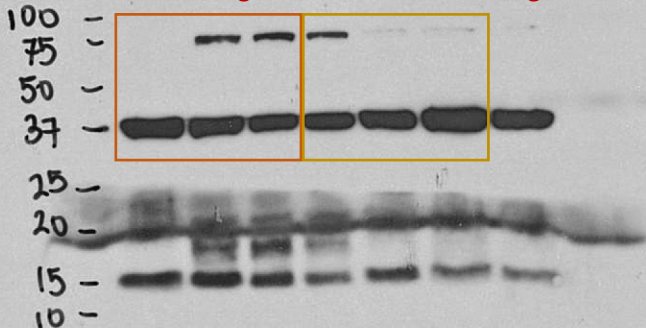

60mM K<sup>+</sup>  
CO14 monocyte

D8 ctrl    D8 KCMY    D9 ctrl    D9 KCMY

Extended-Data Fig4j

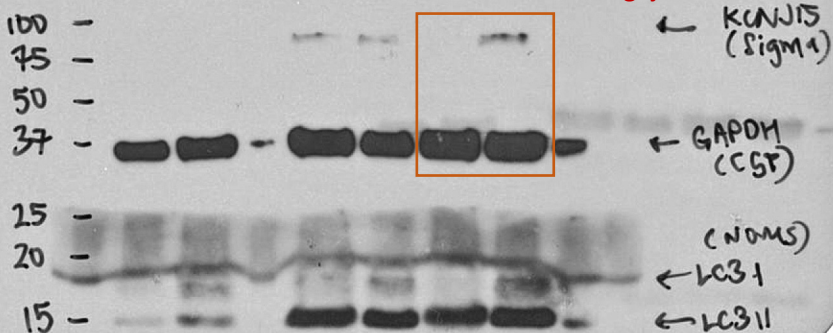

Supplement: 41564_2021_1049_MOESM17_ESM.pdf [file 41564_2021_1049_MOESM17_ESM.pdf]
